# Supplementary material for: GPCR Pharmacological Profiling of Aaptamine from the Philippine Sponge Stylissa sp. Extends Its Therapeutic Potential for Noncommunicable Diseases
Source: Molecules. 2021 Sep 16;26(18):5618. doi: 10.3390/molecules26185618 (PMC8466755; doi:10.3390/molecules26185618)
Supplement: Supplementary file 1 [file molecules-26-05618-s001.zip › molecules-1359914-Supporting Information.pdf]

## Supporting Information

### *GPCR Pharmacological Profiling of Aaptamine from the Philippine Sponge *Stylissa* sp. Extends its Therapeutic Potential for Noncommunicable Diseases*

Harmie Luyao <sup>1,2</sup>, Hendrik Luesch <sup>2,\*</sup>, and Mylene Uy, <sup>1,3\*</sup>

<sup>1</sup>Department of Chemistry, Mindanao State University – Iligan Institute of Technology, Iligan City,

<sup>2</sup>Philippines, 9200; harmie.luyao@g.msuiit.edu.ph

Department of Medicinal Chemistry and Center for Natural Products, Drug Discovery, and Development (CNP3), University of Florida, Gainesville, Florida 32610, United States; luesch@cop.ufl.edu

<sup>3</sup>Premier Research Institute of Science and Mathematics (PRISM), Mindanao State University – Iligan Institute of Technology, Iligan City, Philippines; mylene.uy@g.msuiit.edu.ph

\*Correspondence: mylene.uy@g.msuiit.edu.ph; luesch@cop.ufl.edu

| Contents                                                                                                 | Page Number |
|----------------------------------------------------------------------------------------------------------|-------------|
| Figure S1. <sup>1</sup> H NMR (600 MHz, MeOH- <i>d</i> <sub>4</sub> ) spectrum of aaptamine              | S2          |
| Figure S2. <sup>13</sup> C NMR (150 MHz, MeOH- <i>d</i> <sub>4</sub> ) spectrum of aaptamine             | S3          |
| Figure S3. HSQC (600 MHz, MeOH- <i>d</i> <sub>4</sub> ) spectrum of aaptamine                            | S4          |
| Figure S4. HMBC (600 MHz, MeOH- <i>d</i> <sub>4</sub> ) spectrum of aaptamine                            | S5          |
| Figure S5. COSY (600 MHz, MeOH- <i>d</i> <sub>4</sub> ) spectrum of aaptamine                            | S6          |
| Figure S6. Mass spectrum obtained by High Resolution Electrospray Ionization Mass Spectrometry (HRESIMS) | S7          |
| Figure S7. Positive Allosteric Modulators (PAMs) assay data                                              | S8          |

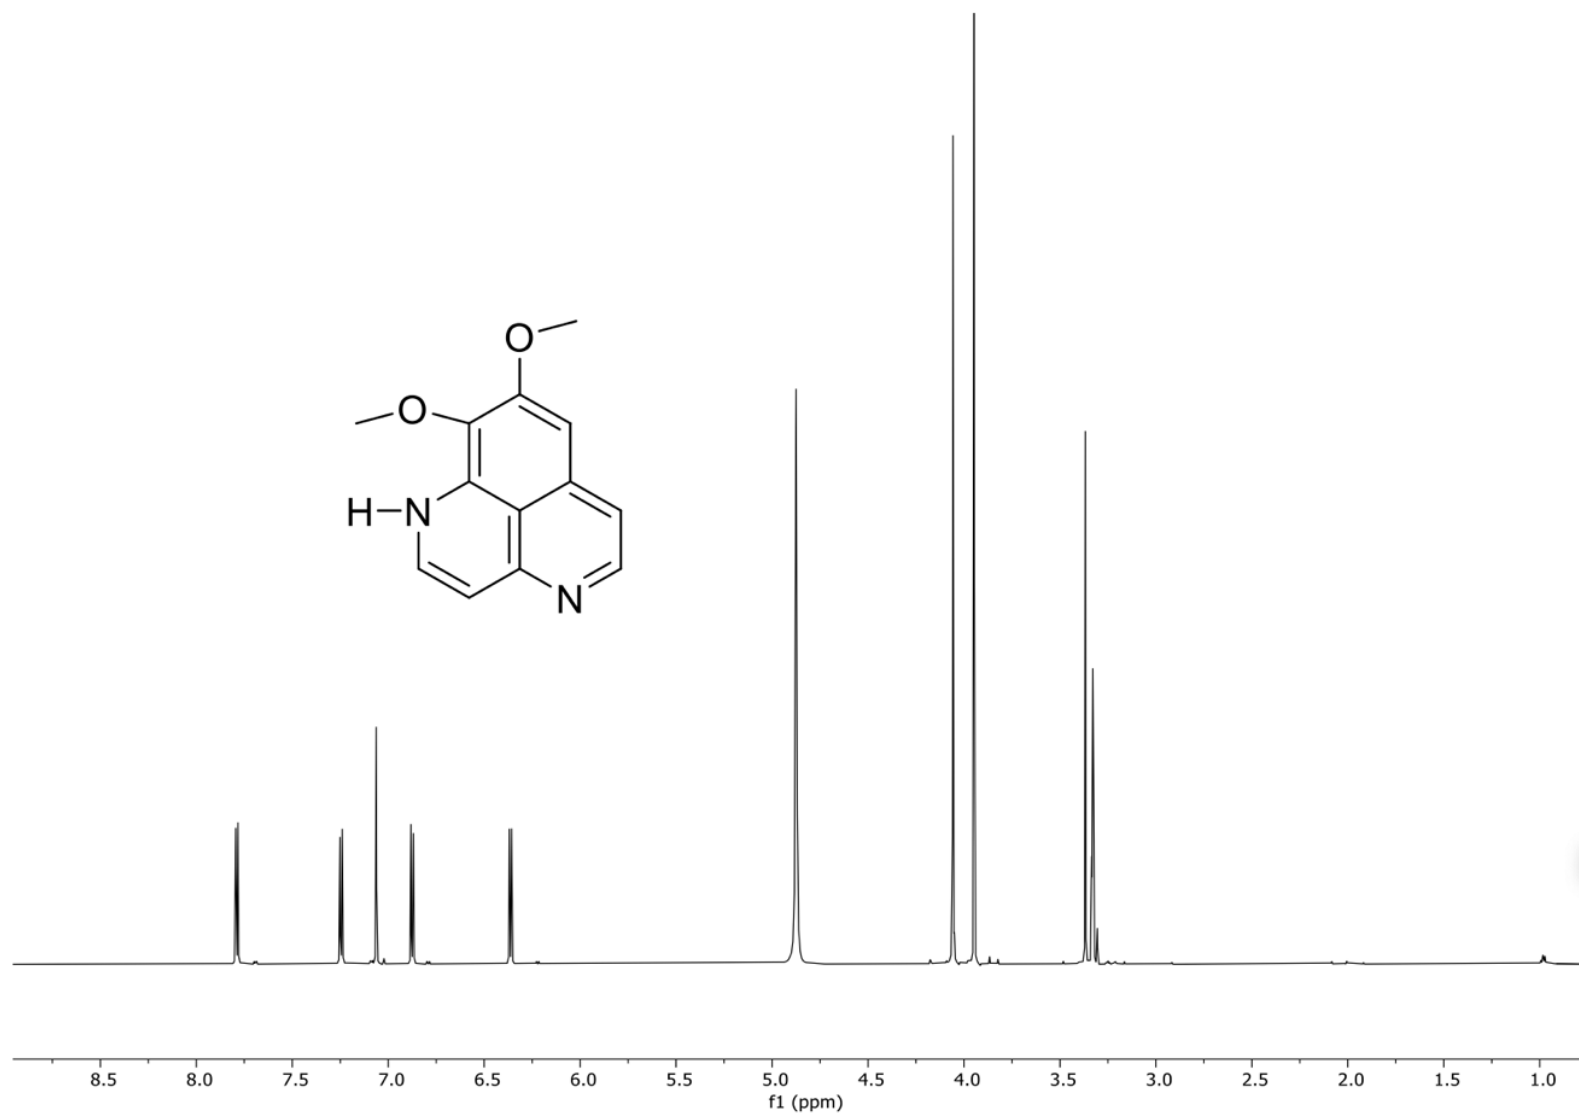

**Figure S1.**  $^1\text{H}$  NMR (600 MHz,  $\text{MeOH-}d_4$ ) spectrum of aaptamine.

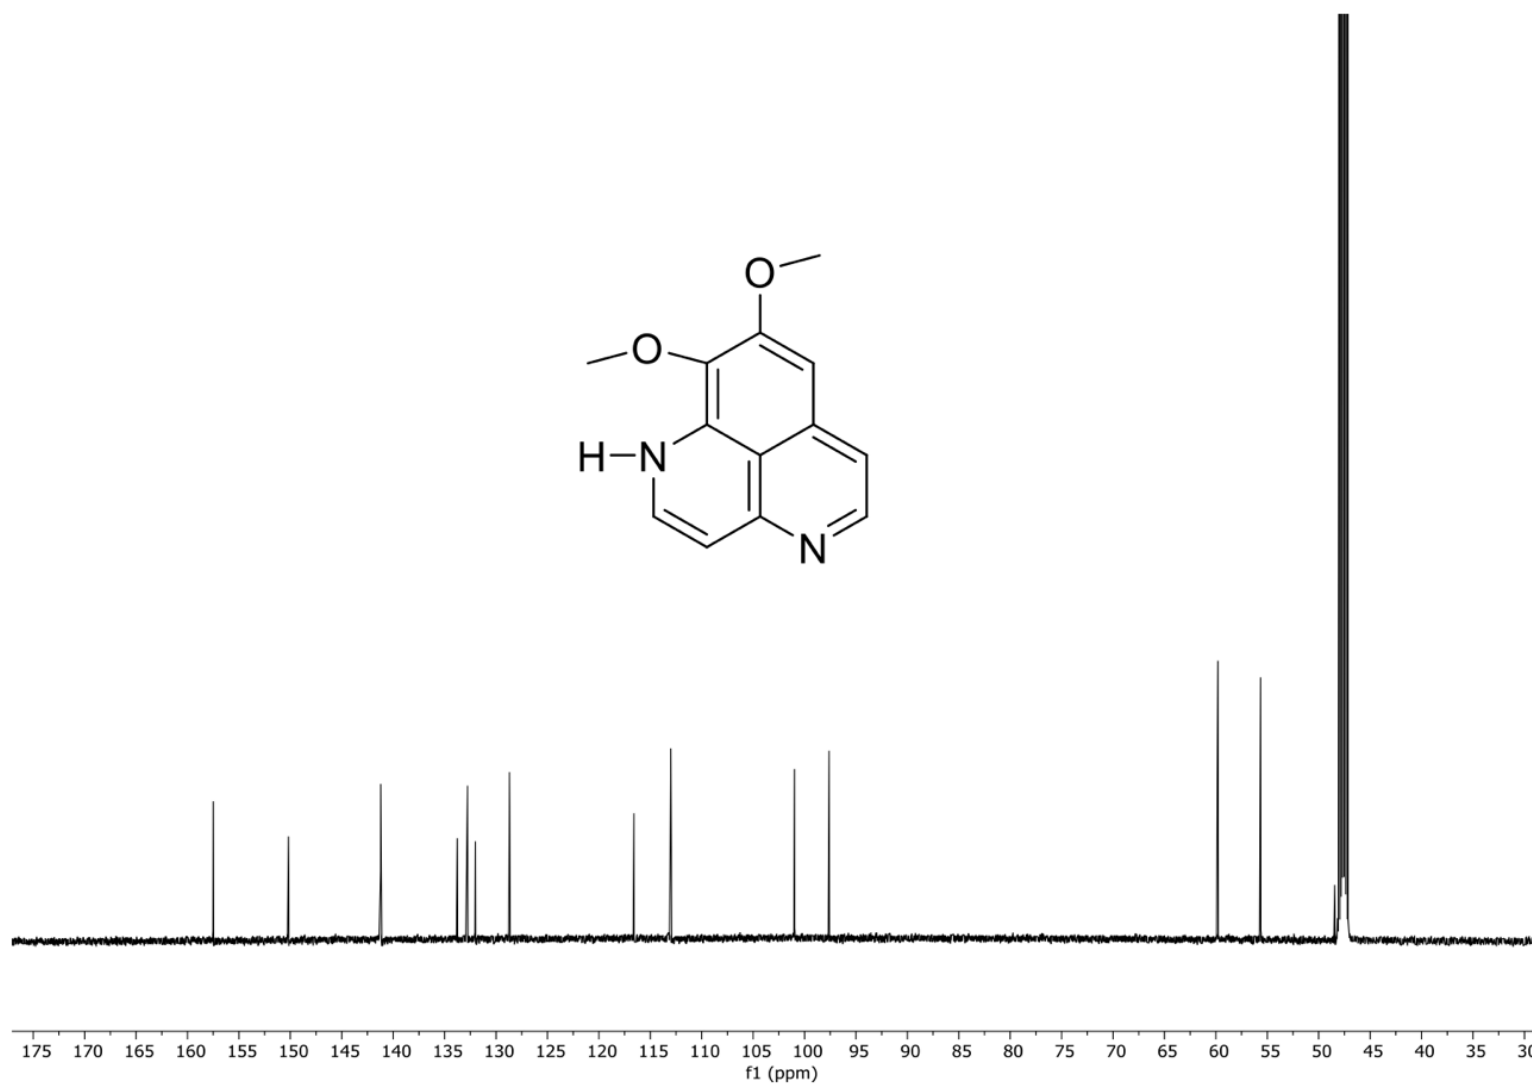

**Figure S2.**  $^{13}\text{C}$  NMR (150 MHz,  $\text{MeOH-}d_4$ ) spectrum of aptamine.

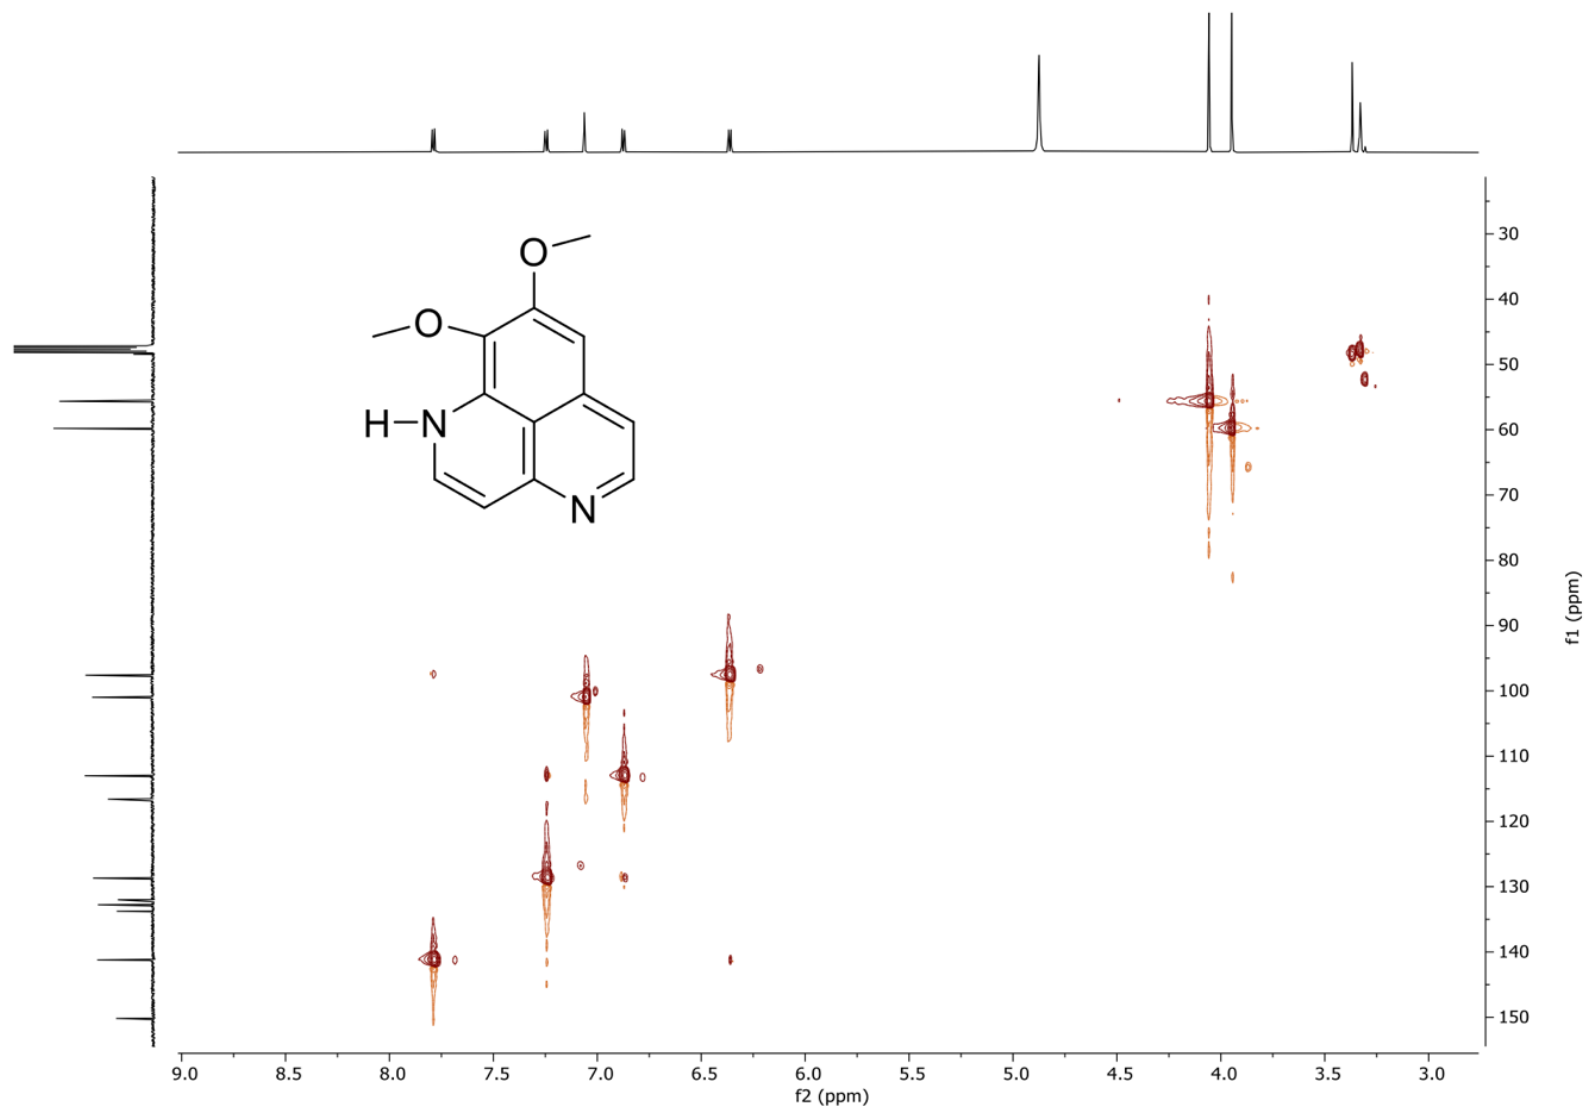

**Figure S3.** HSQC (600 MHz, MeOH- $d_4$ ) spectrum of aaptamine.

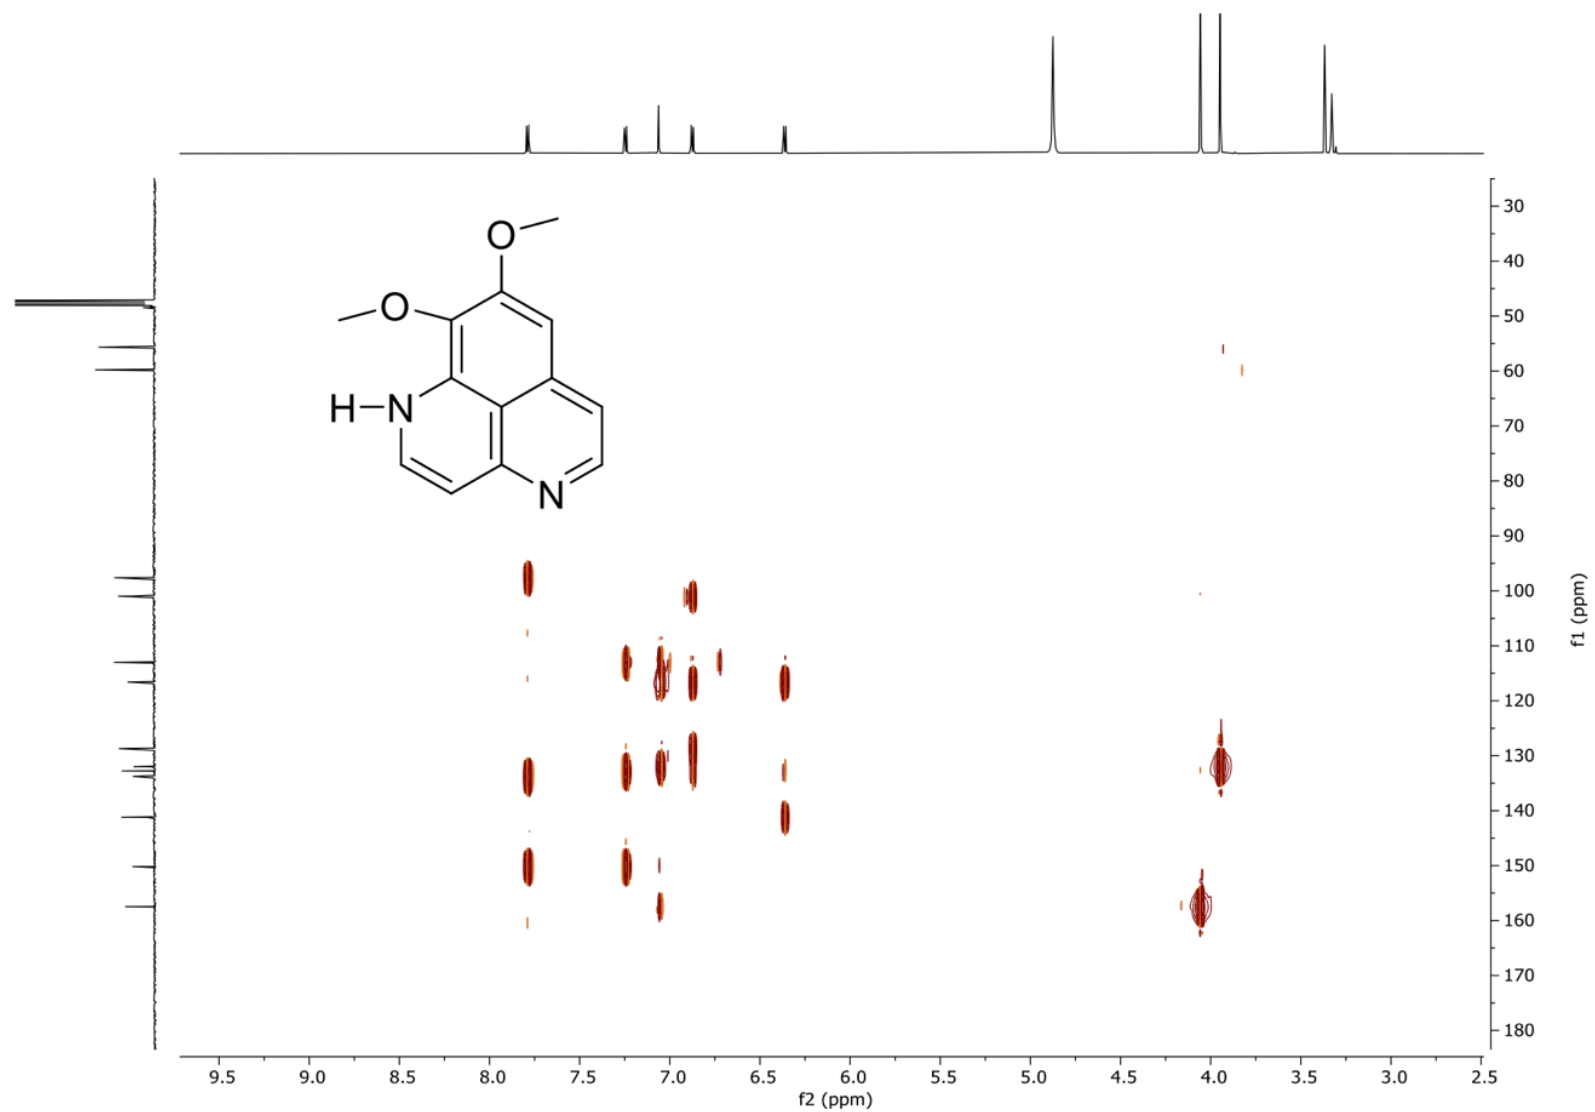

**Figure S4.** HMBC (600 MHz, MeOH-*d*<sub>4</sub>) spectrum of aaptamine.

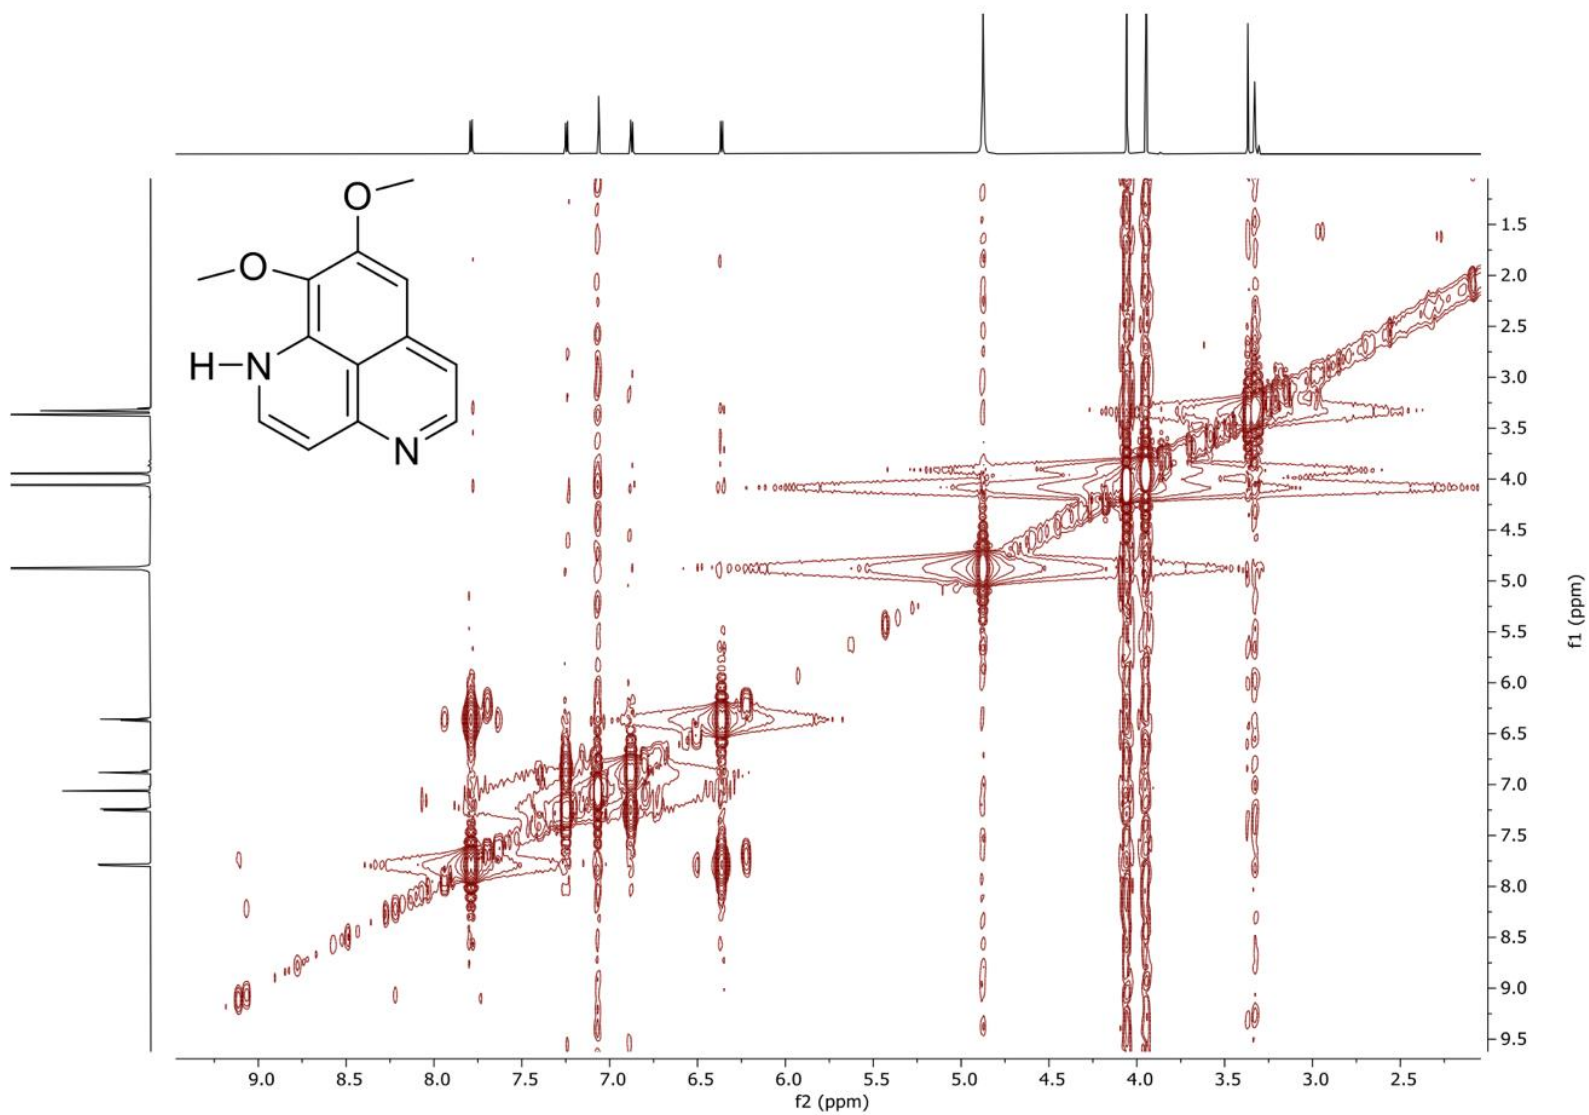

Figure S5. COSY (600 MHz, MeOH-*d*<sub>4</sub>) spectrum of aptamine.

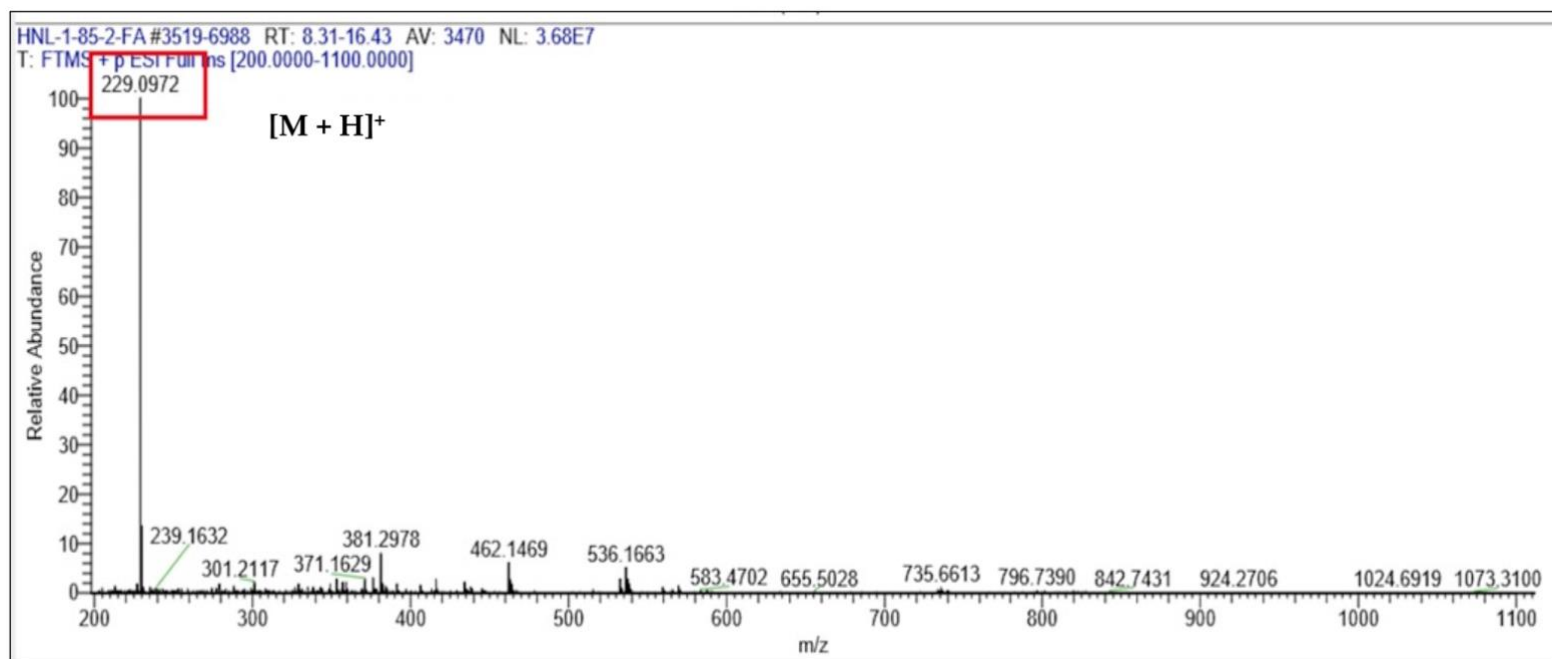

**Figure S6.** Mass spectrum obtained by High Resolution Electrospray Ionization Mass Spectrometry (HRESIMS).

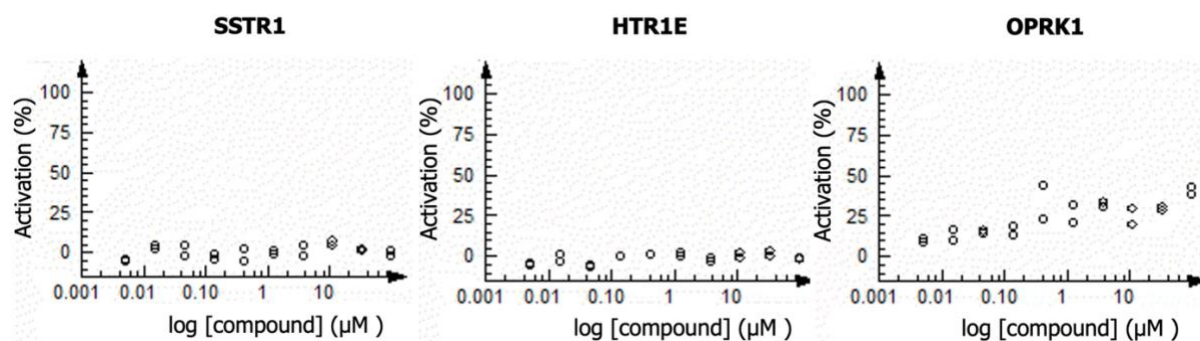

**Figure S7.** Positive Allosteric Modulators (PAMs) assay data. Dose-response curve of aaptamine against SSTR1, HTR1E, and OPRK1 observed in the secondary screening. The control agonist was added at  $EC_{20}$  to determine superactivation of the GPCR in the presence of the compound. The PAM mode showed that the hits identified in the primary screen may be considered false positives. Somatostatin 28 ( $EC_{50} 4.0 \times 10^{-3} \mu M$ ), Serotonin/5-HT ( $EC_{50} 8.4 \times 10^{-3} \mu M$ ), and Dynorphin A ( $EC_{50} 3.4 \times 10^{-2} \mu M$ ) were the ligand used as positive control for SSTR1, HTR1E, and OPRK1, respectively. Data are presented as mean  $\pm$  SD (n = 2).
